# Supplementary material for: Genetic diversity and population structure of Plasmodium falciparum in Nigeria: insights from microsatellite loci analysis
Source: Springer Nature journal article supplement (doi:10.1186/s12936-021-03734-x), 2021-05-26
Supplement: MOESM1 [file 19199904]

| <b>State</b> | Adamawa |      | Bayelsa |      | Enugu |      | Oyo  |      | Imo  |      | Kano |      | Kwara |      | Sokoto |      | Plateau |      |
|--------------|---------|------|---------|------|-------|------|------|------|------|------|------|------|-------|------|--------|------|---------|------|
| <b>Locus</b> | Na      | Ne   | Na      | Ne   | Na    | Ne   | Na   | Ne   | Na   | Ne   | Na   | Ne   | Na    | Ne   | Na     | Ne   | Na      | Ne   |
| PolyA        | 26      | 18.9 | 20      | 12.4 | 35    | 20.4 | 22   | 12.9 | 24   | 18.4 | 36   | 20.2 | 27    | 16.3 | 22     | 14.5 | 23      | 11.7 |
| PfPK2        | 14      | 8.0  | 14      | 7.3  | 16    | 6.7  | 13   | 8.4  | 10   | 7.4  | 17   | 8.2  | 12    | 5.8  | 11     | 6.8  | 10      | 6.0  |
| Ta81         | 13      | 7.4  | 15      | 6.6  | 15    | 6.6  | 12   | 7.0  | 15   | 8.7  | 18   | 6.5  | 19    | 10.4 | 14     | 6.1  | 13      | 5.6  |
| ARA2         | 19      | 15.4 | 20      | 13.8 | 20    | 10.5 | 17   | 9.8  | 14   | 9.3  | 22   | 10.5 | 17    | 12.0 | 10     | 3.8  | 17      | 10.1 |
| TA87         | 23      | 14.6 | 16      | 8.8  | 19    | 11.8 | 15   | 9.8  | 17   | 12.1 | 22   | 9.7  | 19    | 12.9 | 20     | 11.7 | 19      | 13.8 |
| TA40         | 10      | 6.1  | 13      | 4.5  | 13    | 4.0  | 10   | 3.4  | 8    | 2.1  | 19   | 10.1 | 10    | 4.7  | 16     | 9.1  | 9       | 2.9  |
| TA42         | 10      | 2.2  | 4       | 1.3  | 11    | 2.7  | 5    | 2.2  | 7    | 2.3  | 9    | 2.7  | 9     | 3.2  | 9      | 3.0  | 7       | 1.5  |
| 2490         | 6       | 2.8  | 6       | 2.7  | 11    | 3.9  | 5    | 2.6  | 6    | 3.5  | 12   | 4.6  | 8     | 5.1  | 7      | 3.4  | 8       | 3.5  |
| TA1          | 10      | 6.2  | 13      | 6.6  | 21    | 8.8  | 13   | 4.8  | 18   | 11.2 | 18   | 10.4 | 21    | 14.0 | 12     | 2.6  | 14      | 6.2  |
| PFG377       | 7       | 3.4  | 9       | 3.0  | 8     | 3.4  | 5    | 3.5  | 6    | 3.0  | 6    | 3.2  | 8     | 2.9  | 9      | 3.8  | 6       | 2.9  |
| TA109        | 10      | 4.1  | 11      | 5.6  | 15    | 7.0  | 10   | 6.1  | 11   | 5.4  | 17   | 7.4  | 13    | 5.8  | 10     | 6.5  | 15      | 6.9  |
| TA60         | 10      | 6.2  | 7       | 4.5  | 11    | 3.6  | 10   | 3.6  | 4    | 2.1  | 11   | 3.5  | 10    | 5.7  | 9      | 3.2  | 12      | 6.7  |
| Mean         | 13.2    | 7.9  | 12.3    | 6.4  | 16.3  | 7.5  | 11.4 | 6.2  | 11.7 | 7.1  | 17.3 | 8.1  | 14.4  | 8.2  | 12.4   | 6.2  | 12.8    | 6.5  |
| SE           | 1.8     | 1.6  | 1.5     | 1.1  | 2.1   | 1.5  | 1.5  | 0.99 | 1.7  | 1.5  | 2.2  | 1.4  | 1.7   | 1.3  | 1.4    | 1.1  | 1.5     | 1.1  |

**Additional File 1:** shows the Number of different and effective alleles in parasite populations according to study location
