# Supplementary material for: Genetic diversity and population structure of Plasmodium falciparum in Nigeria: insights from microsatellite loci analysis
Source: Springer Nature journal article supplement (doi:10.1186/s12936-021-03734-x), 2021-05-26
Supplement: MOESM2 [file 19199904]

| <b>Loci</b> | <b>AD</b> | <b>BY</b> | <b>IM</b> | <b>SK</b> | <b>KW</b> | <b>KN</b> | <b>EN</b> | <b>PL</b> | <b>OY</b> | <b>Combined</b> |
|-------------|-----------|-----------|-----------|-----------|-----------|-----------|-----------|-----------|-----------|-----------------|
| PolyA       | 14.107    | 11.245    | 11.632    | 11.564    | 11.647    | 28.603    | 27.535    | 14.789    | 14.893    | 21.073          |
| PfPK2       | 9.029     | 9.168     | 8.44      | 8.842     | 8.815     | 12.259    | 11.879    | 7.836     | 8.702     | 10.427          |
| Ta81        | 7.059     | 8.17      | 7.357     | 6.994     | 7.353     | 14.178    | 17.527    | 9.287     | 11.147    | 12.257          |
| ARA2        | 8.423     | 8.448     | 9.367     | 9.489     | 10.593    | 15.452    | 18.123    | 10.86     | 9.581     | 13.845          |
| TA87        | 8.284     | 9.336     | 10.199    | 8.473     | 10.884    | 12.875    | 20.262    | 13.58     | 11.12     | 14.414          |
| TA40        | 4         | 8.721     | 8.144     | 7.739     | 7.115     | 9         | 9.021     | 6.029     | 6         | 9.021           |
| TA42        | 3.492     | 2.203     | 2.343     | 2.431     | 2.809     | 9.349     | 9.44      | 4.007     | 5.563     | 6.293           |
| 2490        | 4.73      | 4.544     | 4.481     | 4.892     | 4.04      | 9.076     | 6.904     | 6.379     | 5.874     | 6.822           |
| TA1         | 7.621     | 8.321     | 7.117     | 7.01      | 7.441     | 17.37     | 21.477    | 9.418     | 9.461     | 14.308          |
| PFG377      | 6.59      | 6.048     | 5.636     | 4.889     | 4.136     | 6.128     | 7.127     | 5.106     | 6.029     | 6.0857          |
| TA109       | 6.694     | 6.498     | 7.523     | 6.419     | 5.689     | 13.122    | 12.359    | 9.162     | 9.954     | 10.574          |
| TA60        | 6.504     | 5.596     | 5.835     | 6.305     | 5.204     | 8.786     | 9.58      | 8.793     | 9.752     | 8.636           |
| Mean        | 7.2       | 7.4       | 7.3       | 7.1       | 7.1       | 13.0      | 14.3      | 8.8       | 9.0       | 11.1            |
| SE          | 2.8       | 2.5       | 2.5       | 2.4       | 2.9       | 5.9       | 6.6       | 3.2       | 2.8       | 4.3             |

*AD: Adamawa, BY: Bayelsa, IM: Imo, SK: Sokoto, KW: Kwara, KN: Kano, EN: Enugu, PL: Plateau and OY: Oyo*

**Additional File 2:** shows the allelic richness values in parasite populations per microsatellite loci
